# Supplementary material for: Multiple lineage specific expansions within the guanylyl cyclase gene family
Source: PubMed Central journal article supplement (PMC1435932; doi:10.1186/1471-2148-6-26), 2006-03-20
Supplement: 1471-2148-6-26-S1.pdf [file 1471-2148-6-26-S1.pdf]

## Accession Numbers

The accession numbers for the sequence data used in this analysis from Genbank release 147.0 and genomes retrieved from Ensembl are as follows: Organisms whose genomes have been completely sequenced are denoted with an asterisk.

### **Insoluble:**

#### ***Homo sapiens* \***

GCA [Genbank:NP\_000897]  
GCB [Genbank:NP\_003986]  
GCC [Genbank:NP\_004954]  
GCD [Genbank:NP\_000171]  
GCF [Genbank:NP\_001513]

#### ***Mus musculus* \***

GCA [Genbank:NP\_032753]  
GCB [Genbank:NP\_776149]  
GCC [Genbank:XP\_132928]  
GCE [Genbank:NP\_032218]  
GCF [Genbank:NP\_001007577]  
GCG [Genbank:XP\_129326]

#### ***Gallus gallus* \***

a [Genbank:XP\_417281]  
b [Genbank:XP\_416207]  
c [Genbank:XP\_429192]

#### ***Caenorhabditis elegans* \***

gcy-1 [Genbank:NM\_063638]  
gcy-2 [Genbank:NM\_063637]  
gcy-3 [Genbank:NM\_063636]  
gcy-4 [Genbank:NM\_063817]  
gcy-5 [Genbank:NM\_063818]  
gcy-6 [Genbank:NM\_073249]  
gcy-7 [Genbank:NM\_001028784]  
gcy-8 [Genbank:NM\_068923]  
gcy-9 [Genbank:NM\_077496]  
gcy-11 [Genbank:NM\_078354]  
gcy-12 [Genbank:NM\_062594]  
gcy-13 [Genbank:NM\_073696]  
gcy-14 [Genbank:NM\_074259]  
gcy-15 [Genbank:NM\_062067]  
gcy-17 [Genbank:NM\_058542]  
gcy-18 [Genbank:NM\_070048]  
gcy-19 [Genbank:NM\_062090]  
gcy-20 [Genbank:NM\_074700]  
gcy-21 [Genbank:NM\_061923]  
gcy-22 [Genbank:NM\_075617]  
gcy-23 [Genbank:NM\_067908]  
gcy-25 [Genbank:NM\_070490]  
gcy-27 [Genbank:NM\_070709]  
odr-1 [Genbank:NM\_077865]

***Drosophila melanogaster* \***

a [Genbank:NP\_611532]  
b [Genbank:NP\_650505]  
c [Genbank:NP\_649477]  
d [Genbank:AAR31133]  
e [Genbank:CAA51319]  
f [Genbank:NP\_648653]

***Anopheles gambiae* \***

a [Genbank:EAA14802]  
b [Genbank:EAA00176]  
c [Genbank:EAA00177]  
d [Genbank:EAA03567]  
e [Genbank:EAA10186]  
f [Genbank:EAA03699]

***Fugu rubripes* \***

a [ENSEMBL:SINFRUG00000121899]  
b [ENSEMBL:SINFRUG00000131285]  
c [ENSEMBL:SINFRUG00000133934]  
d [ENSEMBL:SINFRUG00000140601]  
e [ENSEMBL:SINFRUG00000145293]  
f [ENSEMBL:SINFRUG00000151673]  
g [ENSEMBL:SINFRUG00000155431]  
h [ENSEMBL:SINFRUG00000158909]

***Oryza latipes***

GC1 [Genbank:BAA20563]  
GC2 [Genbank:BAB21106]  
GC3 [Genbank:BAA19205]  
GC4 [Genbank:BAA19206]  
GC5 [Genbank:BAA19207]  
GC6 [Genbank:BAA76279]  
GC7 [Genbank:BAB21105]  
GC8 [Genbank:BAB21378]  
GC9 [Genbank:BAD11374]  
OIGCR2 [Genbank:BAA76301]

***Apis mellifera* \***

a [ENSEMBL:ENSAPMG00000005958]  
b [ENSEMBL:ENSAPMG00000006282]  
c [ENSEMBL:ENSAPMG00000006724]  
d [ENSEMBL:ENSAPMG00000006725]

**Echinoderms**

*Asterias amurensis* [Genbank:BAB85468]  
*Brissus agassizii* [Genbank:BAA75197]  
*Diadema setosum* [Genbank:BAA85332]  
*Arbacia punctulata* [Genbank:OYURGA]  
*Hemicentrotus pulcherrimus* [Genbank:BAA04660]  
*Strongylocentrotus purpuratus* [Genbank:NP999705]  
*Stichopus japonicus* [Genbank:BAA75224]

**Miscellaneous**

*Bactrocera dorsalis* [Genbank:AAM94353]  
*Manduca sexta* [Genbank:AAN16469]

*Bombyx mori* [Genbank:BAB32672]

**Soluble:**

***Homo sapiens* \***

beta-1 [Genbank:NP\_000848]  
beta-2 [Genbank:NP\_004120]  
alpha-1 [Genbank:NP\_000847]  
alpha-2 [Genbank:NP\_000846]

***Mus musculus* \***

beta-1 [Genbank:NP\_059497]  
beta-2 [Genbank:NP\_766398]  
alpha-1 [Genbank:NP\_068696]  
alpha-2 [Genbank:XP\_150145]

***Caenorhabditis elegans* \***

gcy-31 [Genbank:NM\_001029719]  
gcy-32 [Genbank:NM\_074051]  
gcy-33 [Genbank:NM\_073609]  
gcy-34 [Genbank:NM\_073918]  
gcy-35 [Genbank:NM\_060943]  
gcy-36 [Genbank:NM\_078156]  
gcy-37 [Genbank:NM\_067770]

***Gallus gallus*\***

alpha-1 [Genbank:XP\_420375]  
alpha-2 [Genbank:XP\_420375]  
beta-2 [Genbank:XP\_426684]

***Apis mellifera* \***

alpha-1 [Genbank:BAD6682]  
beta-1 [Genbank:AAV34676]

***Fugu rubripes* \***

beta-1 [Genbank:BAB60908]  
alpha-2 [Genbank:BAC76397]  
alpha-1 [Genbank:BAB60907]  
beta-2 [ENSEMBL:SINFRUG00000128383]

***Drosophila melanogaster* \***

Gyc88E [Genbank:AAF55135]  
Gyc-89Da [Genbank:AAF55322]  
Gyc-89Db [Genbank:AAF55323]  
beta [Genbank:AAF57119]  
alpha [Genbank:AAF56917]

***Limax marginatus***

beta-1 [Genbank:BAC80152]  
beta-2 [Genbank:BAC80153]  
alpha [Genbank:BAC80151]

***Manduca sexta***

beta-1 [Genbank:AAC61264]

beta-2 [Genbank:AAD09836]

alpha-1 [Genbank:AAC61263]

**Miscellaneous**

*Bactrocera dorsalis* alpha-1 [Genbank:AAP85539]

*Aplysia californica* [Genbank:AAK97794]

*Anopheles gambiae* beta [Genbank:AAC47144]

**Additional bacterial sequences for Figure 7**

*Shewanella oneidensis* [Genbank:ZP\_00111432],

*Thermoanaerobacter tengcongensis* [Genbank:NP\_622340],

*Magnetococcus* [Genbank:EAN29238],

*Caulobacter crescentus* [Genbank:AAK24954],

*Legionella pneumophila* [Genbank:AAU28519],

*Rhodobacter sphaeroides* [Genbank:ABA79585]

*Clostridium acetobutylicum* [Genbank:NP\_349837],

*Nostoc* [Genbank:ZP\_00111432],

*Anabaena* [Genbank:BAB73977]
